# Supplementary material
Source: PubMed Central journal article supplement (PMC5601337)
Supplement: AEM.01197-17_zam999118085s1.pdf [file AEM.01197-17_zam999118085s1.pdf]

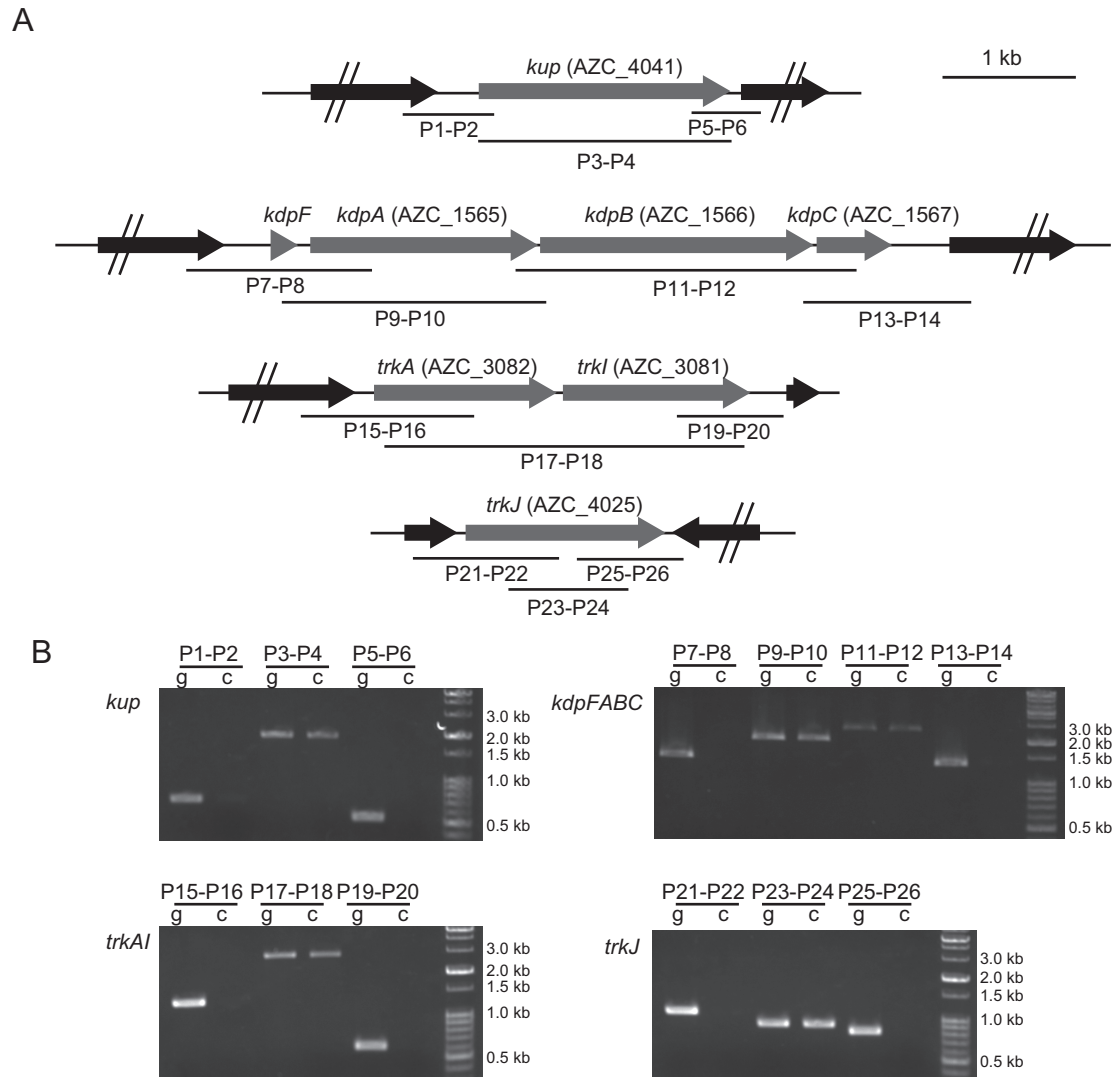

**Fig. S1.** Determination of transcription units of  $K^+$  uptake system genes of *A. caulinodans* (A) Maps of the *kdpFABC*, *kup*, *trkAI*, and *trkJ* with target regions for RT-PCR analyses. (B) RT-PCR analyses to determine transcription units of *kdpFABC*, *kup*, *trkAI*, and *trkJ*. cDNA was synthesized using total RNA (0.5  $\mu$ g) from WT strain grown in a medium containing 0.5 mM  $K^+$  at 38°C. Subsequent PCRs were performed using the cDNAs (c) and WT genomic DNA ( $1 \times 10^{-1}$  ng  $\mu$ l $^{-1}$ ; g) as templates with the indicated primer pairs.

**Table S1.** Features of the predicted amino acid sequences encoded by K<sup>+</sup> uptake system genes of *A. caulinodans* ORS571.

| K <sup>+</sup> uptake system genes of <i>A. caulinodans</i> |              | Sequence identity based on blastp program                                                                                                                                                               | number of transmembrane regions based on SOSUI program |
|-------------------------------------------------------------|--------------|---------------------------------------------------------------------------------------------------------------------------------------------------------------------------------------------------------|--------------------------------------------------------|
| name                                                        | locus tag    |                                                                                                                                                                                                         |                                                        |
| <i>kup</i>                                                  | AZC_4041     | 40% with <i>E. coli</i> Kup (E-value: 3e-148)                                                                                                                                                           | 12                                                     |
| <i>kdpF</i>                                                 | not assigned | 69% with <i>Methylobacterium extorquens</i> DM4 KdpF (E-value: 1e-04)<br>62% with <i>Rhizobium</i> sp. AP16 KdpF (E-value: 2e-04)<br>62% with <i>Agrobacterium</i> sp. ATCC 31749 KdpF (E-value: 2e-04) | 1                                                      |
| <i>kdpA</i>                                                 | AZC_1565     | 53% with <i>E. coli</i> KdpA (E-value: 2e-158)                                                                                                                                                          | 10                                                     |
| <i>kdpB</i>                                                 | AZC_1566     | 61% with <i>E. coli</i> KdpB (E-value: 0.0)                                                                                                                                                             | 7                                                      |
| <i>kdpC</i>                                                 | AZC_1567     | 47% with <i>E. coli</i> KdpC (E-value: 1e-32)                                                                                                                                                           | 1                                                      |
| <i>trkA</i>                                                 | AZC_3082     | 40% with <i>E. coli</i> TrkA (E-value: 6e-104)                                                                                                                                                          | 0                                                      |
| <i>trkI</i>                                                 | AZC_3081     | 24% with <i>E. coli</i> TrkG (E-value: 9e-11)<br>26% with <i>E. coli</i> TrkH (E-value: 3e-16)                                                                                                          | 11                                                     |
| <i>trkJ</i>                                                 | AZC_4025     | 35% with <i>E. coli</i> TrkG (E-value: 3e-76)<br>34% with <i>E. coli</i> TrkH (E-value: 1e-73)                                                                                                          | 11                                                     |
